# Supplementary material
Source: PubMed Central journal article supplement (PMC3089528)
Supplement: supp_M110.187559_jbc.M110.187559-1.pdf [file supp_M110.187559_jbc.M110.187559-1.pdf]

**Supplementary Information**

**Supplementary Table 1**

| <b>Target mRNA</b> | <b>Primer identity</b> | <b>Sequence</b>                   | <b>T<sub>A</sub> (°C)</b> | <b>Expected product size (nt)</b>   |
|--------------------|------------------------|-----------------------------------|---------------------------|-------------------------------------|
| Nav1.1             | hNav1-1F               | 5'-ATG ACA ATG ATG AAC CCT CC-3'  | 58                        | 568                                 |
| Nav1.1             | hNav1-1R               | 5'-GTGCAT CTA AAA AAC CCT CC-3'   | 58                        |                                     |
| Nav1.2             | 2HB1                   | 5'-TGT GCA CGA TTC TTA CCA AC-3'  | 58                        | 513                                 |
| Nav1.2             | 2HB3                   | 5'-AAG TAG TAC CAT TCC CAT CC-3'  | 58                        |                                     |
| Nav1.3             | H3A                    | 5'-TTG AGC AAC CCT CCT GAC TG-3'  | 60                        | 405                                 |
| Nav1.3             | H3C                    | 5'-GGG CCA CTG CAA ACA TTT AT-3'  | 60                        |                                     |
| Nav1.4             | HSK1A                  | 5'-GGG ATC TAC ACC TTT GAG TC-3'  | 60                        | 428                                 |
| Nav1.4             | HSK1C                  | 5'-CCA TAC CAT GTG TCA TTG CC-3'  | 60                        |                                     |
| Nav1.5             | hH1                    | 5'-CAT CCT CAC CAA CTG CGT GT-3'  | 58                        | 509                                 |
| Nav1.5             | hH2                    | 5'-CAC TGA GGT AAA GGT CCA GG-3'  | 58                        |                                     |
| Nav1.6             | H6D                    | 5'-AGA CCA TCC GCA CCA TCC TG-3'  | 60                        | 517<br>(adult)<br>464<br>(neonatal) |
| Nav1.6             | H6C                    | 5'-TGT CAA AGT TGA TCT TCA CG-3'  | 60                        |                                     |
| Nav1.7             | HNE1                   | 5'-TAT GAC CAT GAA TAA CCC GC-3'  | 59                        | 389                                 |
| Nav1.7             | HNE3                   | 5'-TCA GGT TTC CCA TGA ACA GC-3'  | 59                        |                                     |
| Nav1.8             | scn10a-P1              | 5'-TGG AAC TGG CTG GAT TTT AG-3'  | 58                        | 434                                 |
| Nav1.8             | scn10a-P2              | 5'-TCC GGG TTG TCA GAA GTT TT-3'  | 58                        |                                     |
| Nav1.9             | scn11a-P1              | 5'-ATT ATC GGC ACC GTT ATC AT-3'  | 56                        | 448                                 |
| Nav1.9             | scn11a-P2              | 5'-TGC ATT TCA GGT TCA GAC TT-3'  | 56                        |                                     |
| NaX                | hNaxF                  | 5'-TGC GGC TTC CAT CTT GTG TA-3'  | 60                        | 562                                 |
| NaX                | hNaxR                  | 5'-GTG CAG GGT TTC ATT TTC ATT-3' | 60                        |                                     |
| VGSCβ1             | h1bF                   | 5'- AGAAGGGCACTGAGGAGTTT-3'       | 60                        | 379                                 |
| VGSCβ1             | h1bR                   | 5'- GCAGCGATCTTCTTGTAGCA-3'       | 60                        |                                     |
| VGSCβ2             | h2bF                   | 5'-GAGATGTTCCCTCCAGTTCCG-3'       | 62                        | 310                                 |
| VGSCβ2             | h2bR                   | 5'-TGACCACCATCAGCACCAAG-3'        | 62                        |                                     |
| VGSCβ3             | h3bF                   | 5'-CTGGCTTCTCTCGTGCTTAT-3'        | 60                        | 353                                 |
| VGSCβ3             | h3bR                   | 5'-TCAAACCTCCCGGACACATT-3'        | 60                        |                                     |
| VGSCβ4             | h4bF                   | 5'-TAACCCTGTCGCTGGAGGTG-3'        | 64                        | 459                                 |
| VGSCβ4             | h4bR                   | 5'-TGAGGATGAGGAGCCCGATG-3'        | 64                        |                                     |
| B-actin            | hb-actinF              | 5'-CAC TGA GGT AAA GGT CCA GG-3'  | 59                        |                                     |
| B-actin            | hb-actinR              | 5'-TGT CAA AGT TGA TCT TCA CG-3'  | 59                        |                                     |

## Supplementary Figures

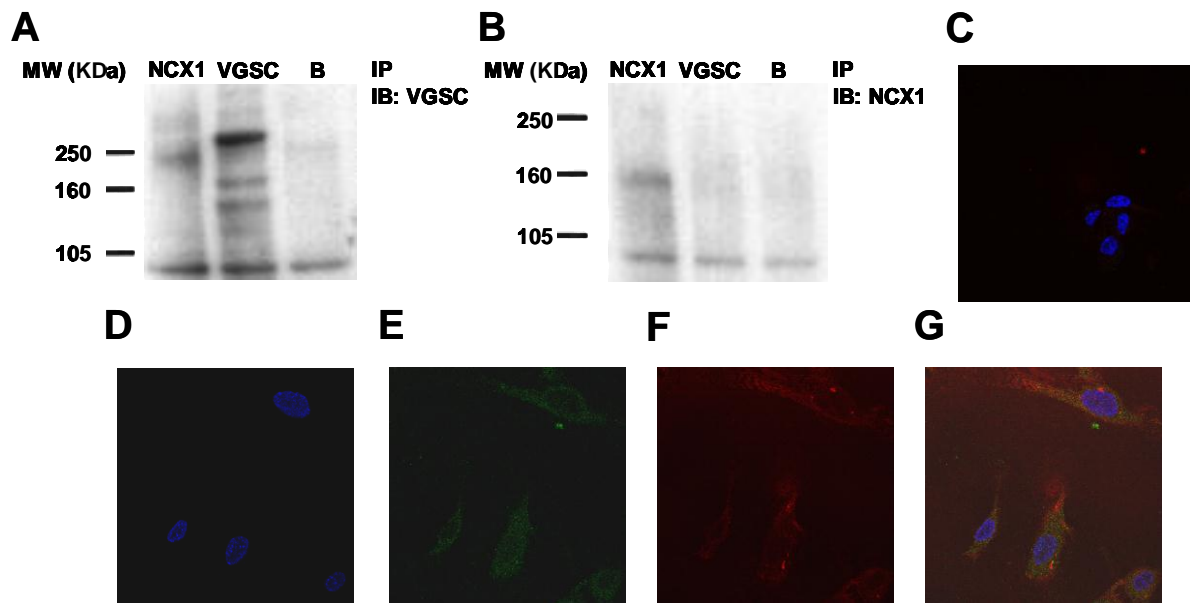

**Figure S.1. VGSC and NCX1 are not physically associated in HUVECs.** Proteins extracted from HUVECs were solubilized and immunoprecipitated (IP) with antibodies to NCX1, VGSC or protein-A agarose beads only, B. Immunoblots were probed (IB) for NCX1 (A) or VGSC (B). (N=3). Confocal fluorescence images of HUVECs stained with anti-NCX1 (green, E), PAN anti-VGSC (red, F). Nuclei were stained with tropo-3 (blue, D); merged image G. Controls with primary antibodies omitted is shown in C. Images were acquired with a Leica SP1 scanning confocal microscope at 60X magnification.

A

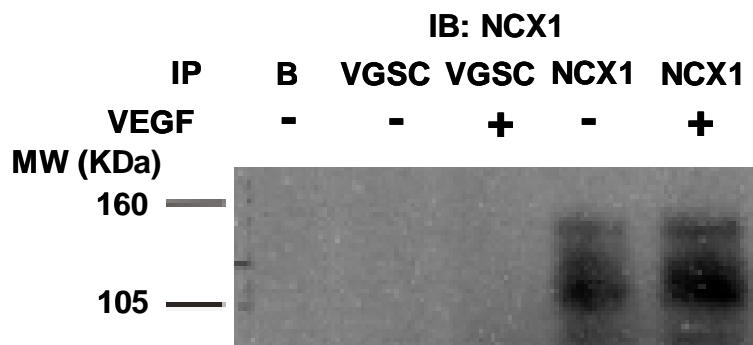

B

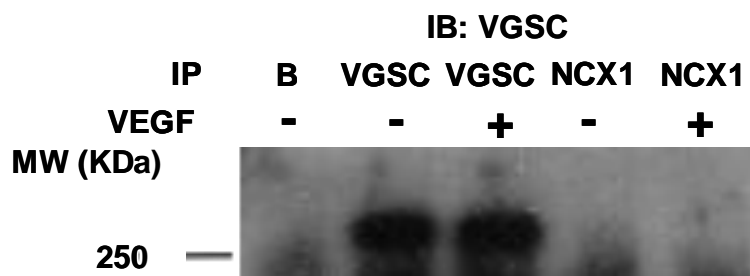

Figure S.2. Serum-starved HUVECs were exposed to VEGF (50ng/ml) for 10min. Subsequently, proteins were solubilised and subjected to immunoprecipitation (IP) with the following antibodies absorbed on protein-A coated agarose beads NCX1: NCX1 antibody, VGSC: PAN anti-VGSC antibody, B: protein-A agarose beads only. Immunoblots were probed (IB) with an anti NCX1 antibody (A) or a PAN anti-VGSC antibody (B). Representative immunoblots from N=2 identical repeats is shown.

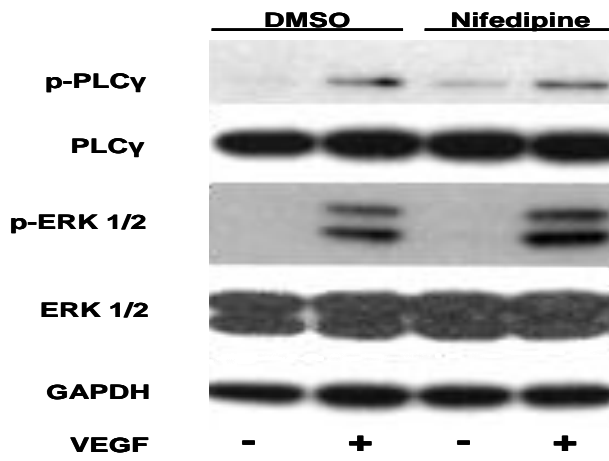

Figure S.3. HUVECs were preincubated for 30min with 1 $\mu$ M nifedipine, or vehicle and then stimulated with 50ng/ml VEGF for 10min. ERK 1/2 and PLC $\gamma$  activation in cell lysates was determined by western blot analysis as described in the legend of Figure 5A. Representative immunoblots are shown (N=3).
